# Supplementary material
Source: PubMed Central journal article supplement (PMC6954276)
Supplement: NIHMS1541313-supplement-Sup_Fig9.pdf [file NIHMS1541313-supplement-Sup_Fig9.pdf]

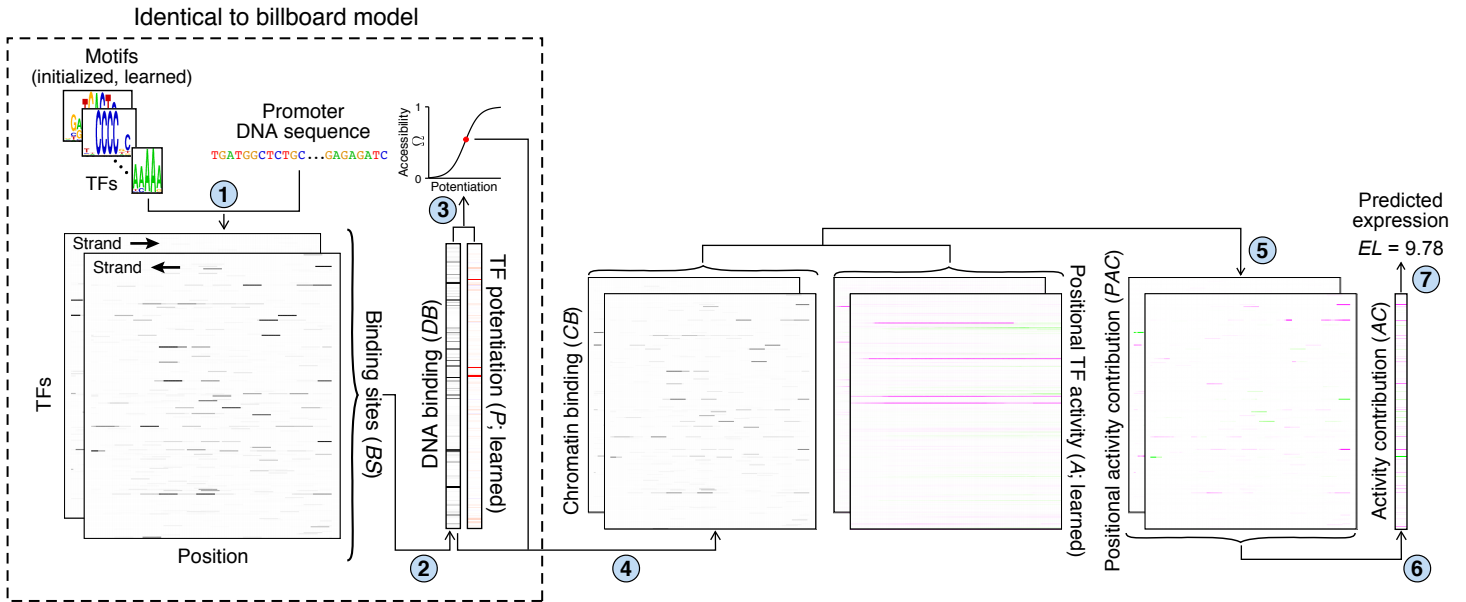

Strand  $s$ , position  $i$ , TF  $x$

- ① Identify binding sites (BS)

$$BS_{xsi} = \frac{1}{1 + \frac{Kd_{xsi}}{C_x}}$$

- ② "Billboard" summary of TF binding to DNA

$$DB_x = \sum_{i,s} BS_{xsi}$$

- ③ Predict accessibility

$$\Omega = \frac{1}{1 + e^{DB \cdot P + c_p}}$$

- ④ Calculate *positional* TF binding to chromatin

$$CB = DB \times \Omega$$

- ⑤ Calculate positional activity contribution

$$PAC = CB \circ A$$

- ⑥ Summarize activity contribution per TF

$$AC_x = \sum_{i,s} PAC_{xsi}$$

- ⑦ Predict expression level

$$EL = \sum_x AC_x + c_e$$
