# Supplementary material
Source: PubMed Central journal article supplement (PMC6954276)

# Supp. Fig. 1

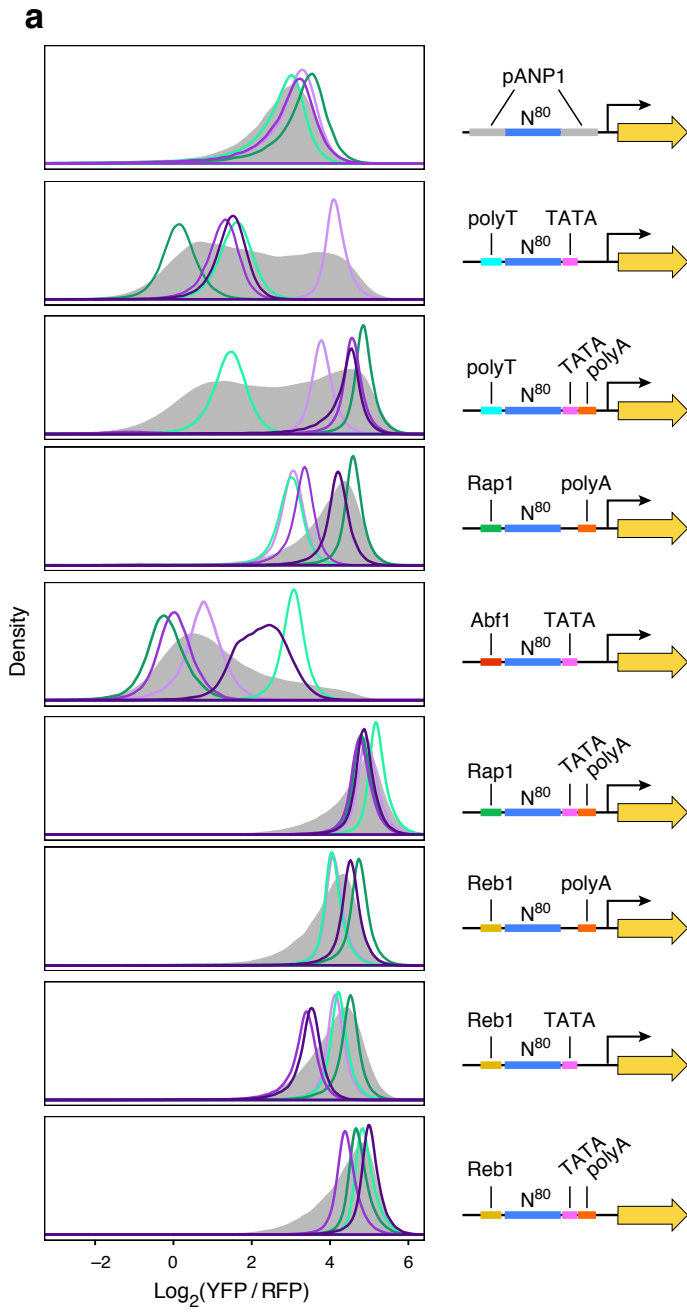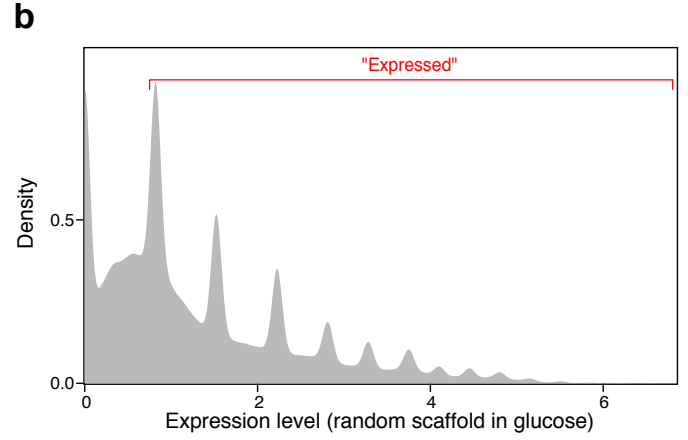

Supplement: NIHMS1541313-supplement-Sup_Fig1.pdf [file NIHMS1541313-supplement-Sup_Fig1.pdf]

Supp. Fig. 10

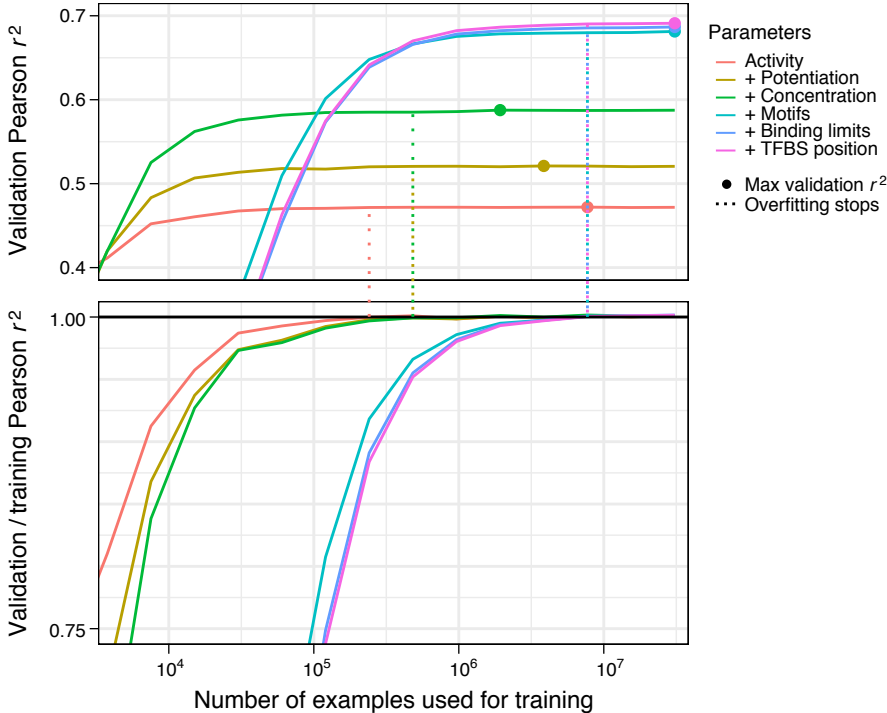

Supplement: NIHMS1541313-supplement-Sup_Fig10.pdf [file NIHMS1541313-supplement-Sup_Fig10.pdf]

Supp. Fig. 11

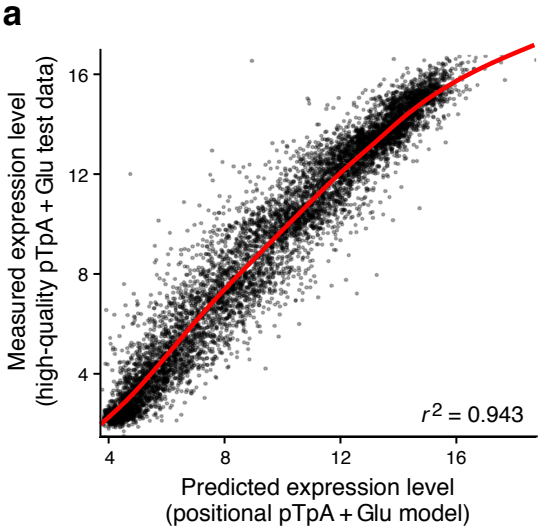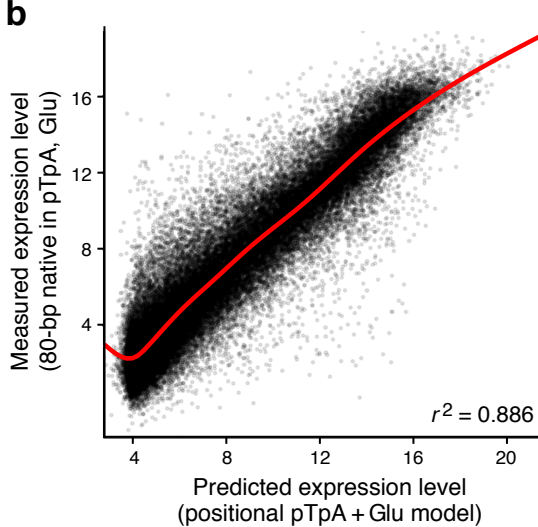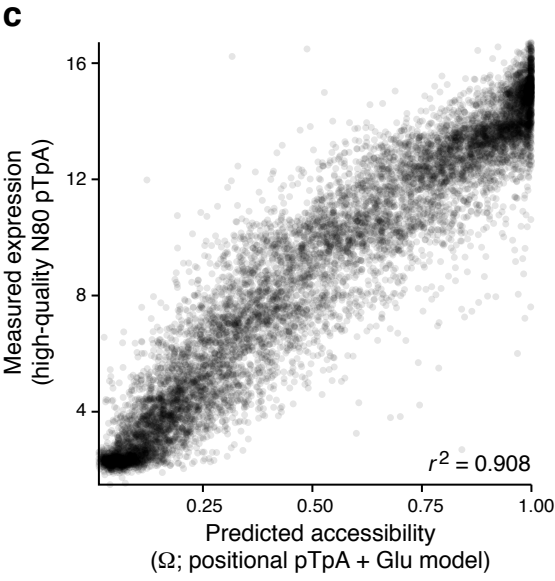

Supplement: NIHMS1541313-supplement-Sup_Fig11.pdf [file NIHMS1541313-supplement-Sup_Fig11.pdf]

# Supp. Fig. 12

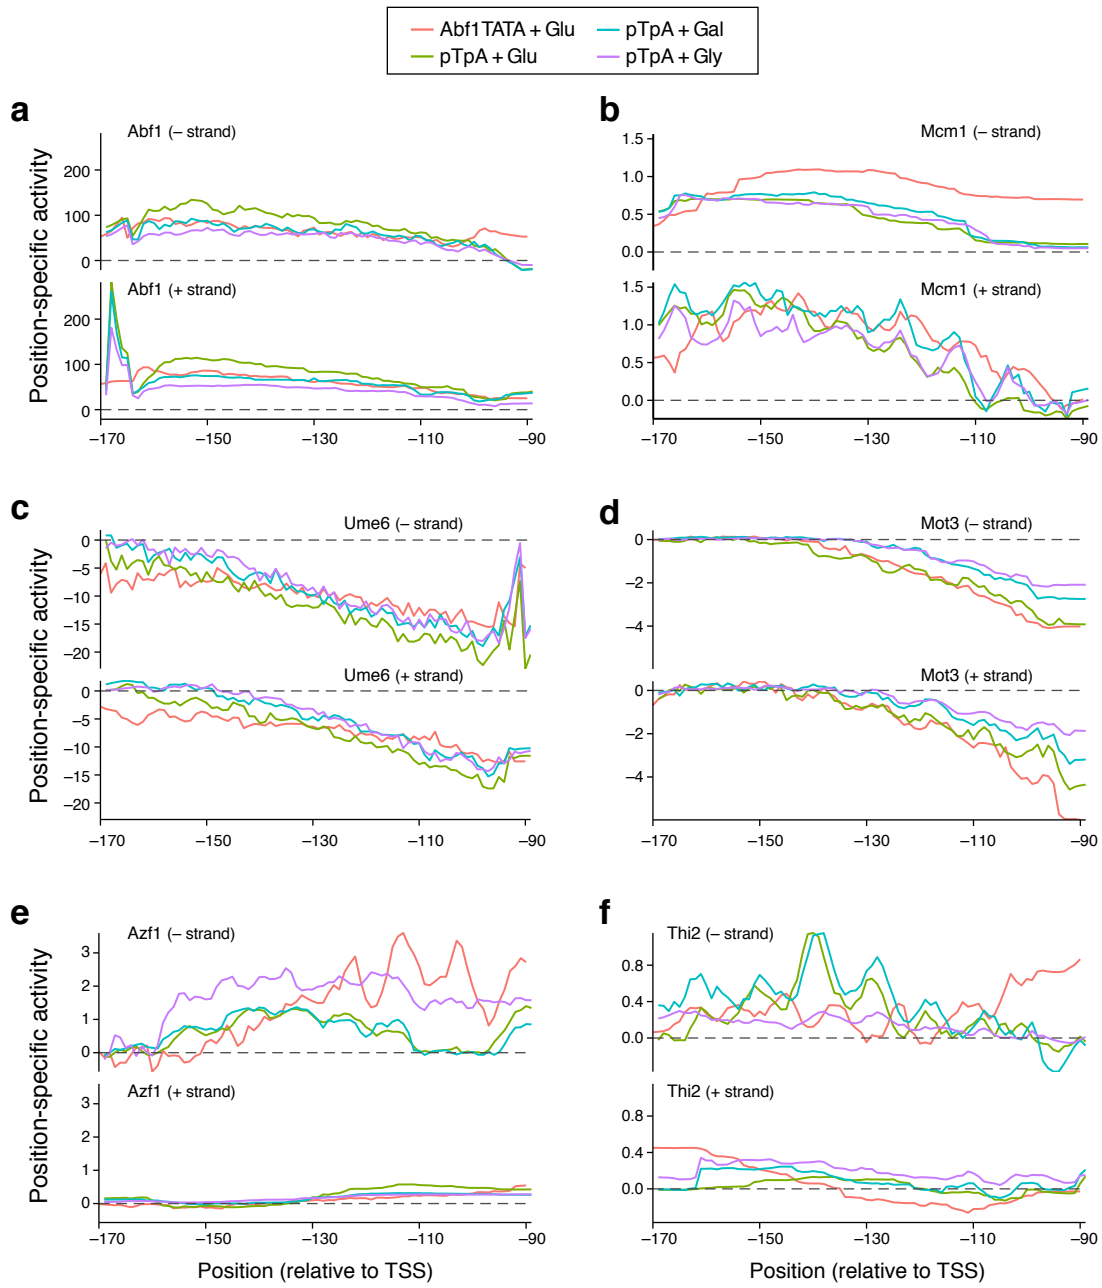

Supplement: NIHMS1541313-supplement-Sup_Fig12.pdf [file NIHMS1541313-supplement-Sup_Fig12.pdf]

# Supp. Fig. 13

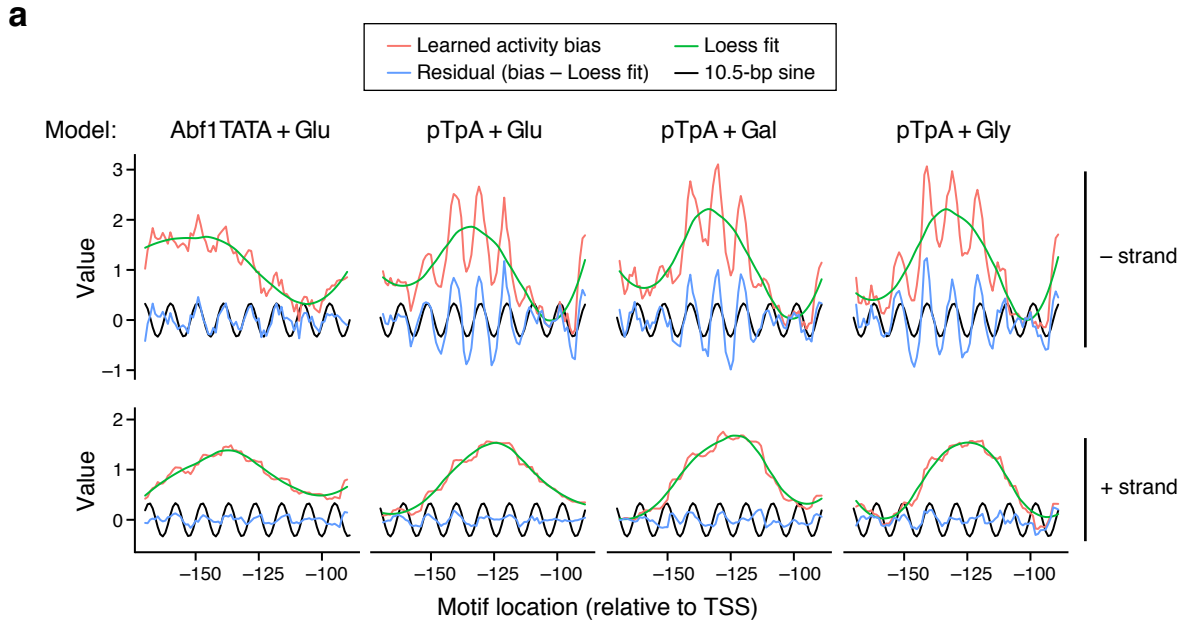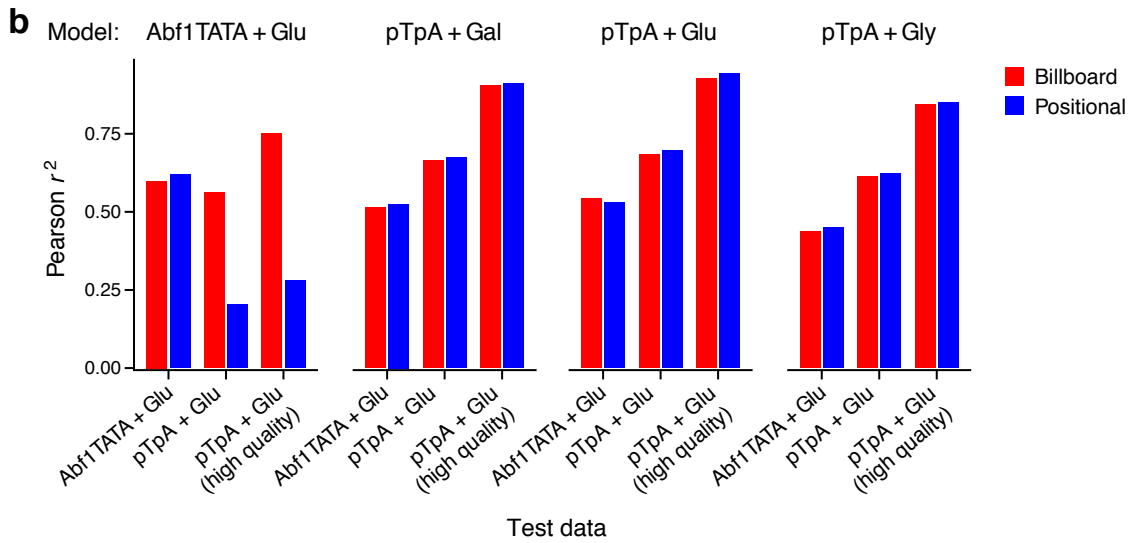

Supplement: NIHMS1541313-supplement-Sup_Fig13.pdf [file NIHMS1541313-supplement-Sup_Fig13.pdf]

# Supp. Fig. 14

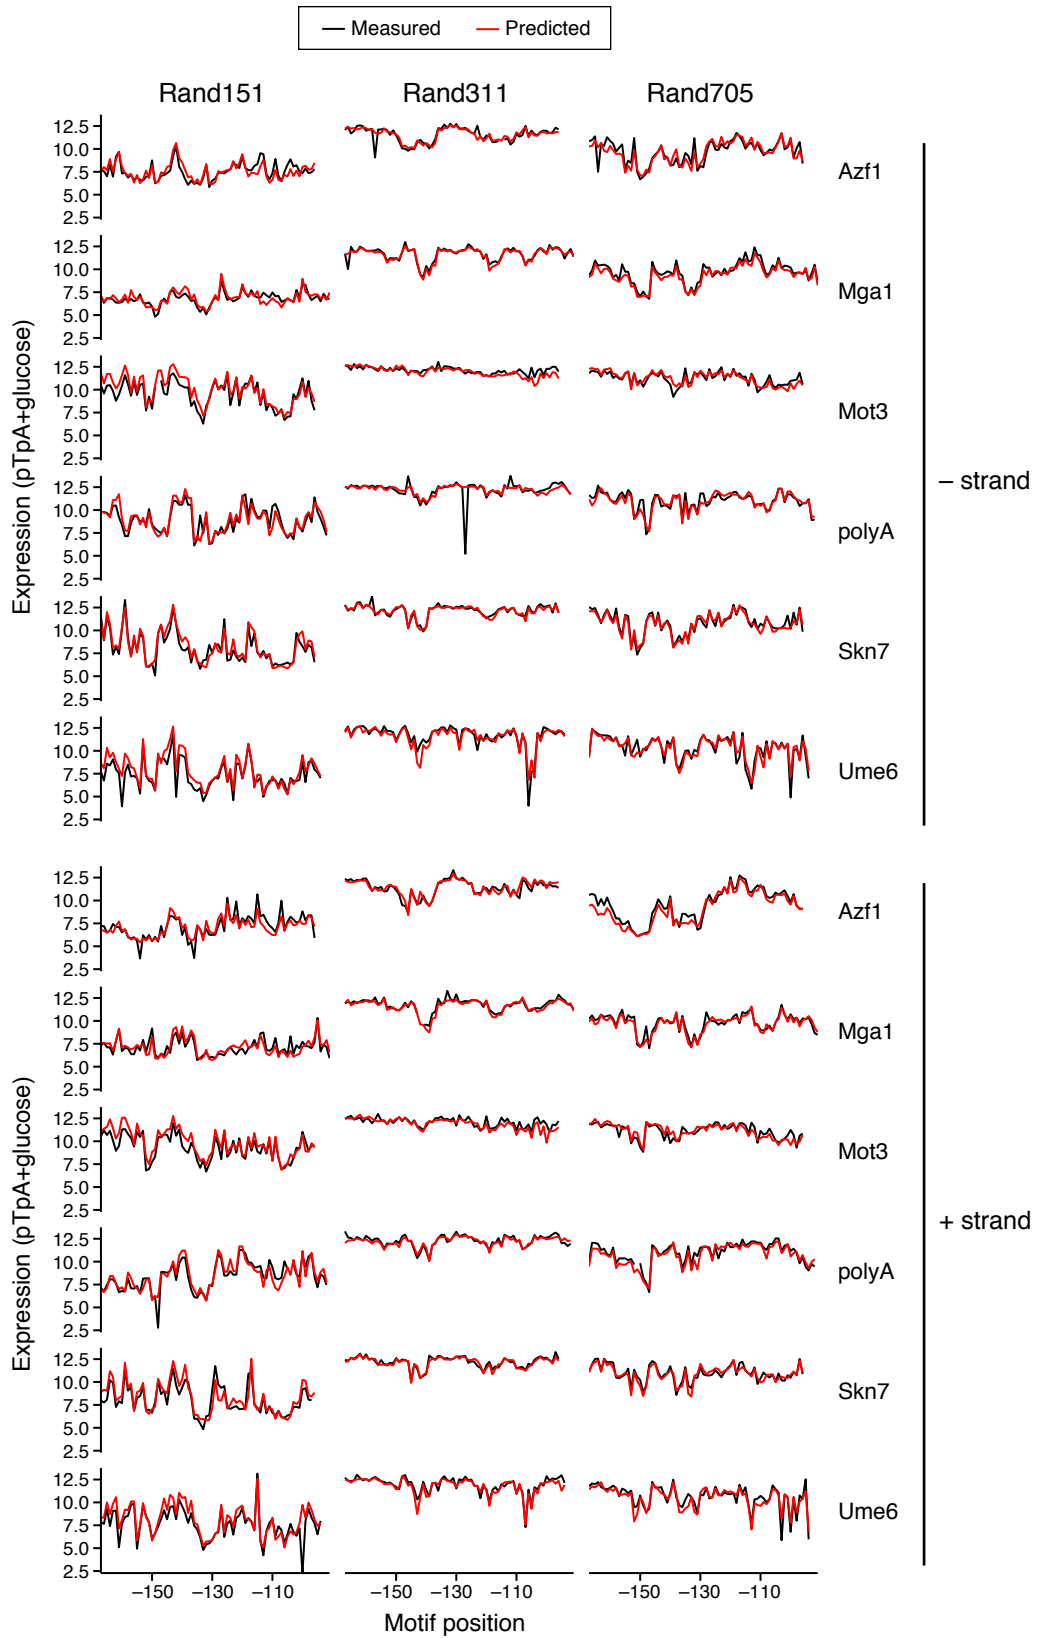

Supplement: NIHMS1541313-supplement-Sup_Fig14.pdf [file NIHMS1541313-supplement-Sup_Fig14.pdf]

# Supp. Fig. 15

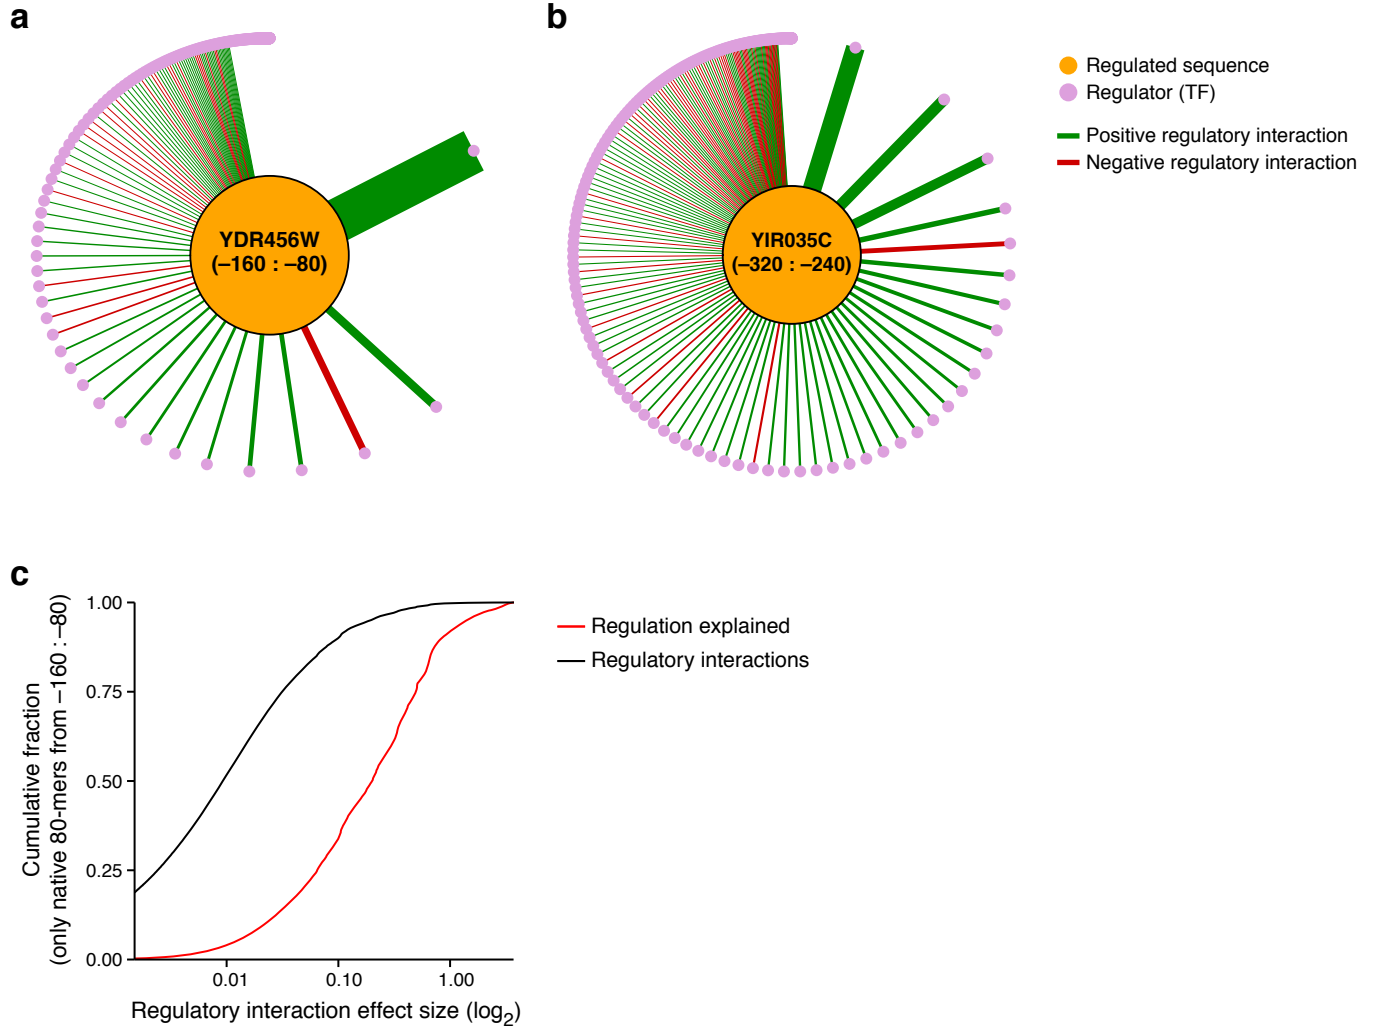

Supplement: NIHMS1541313-supplement-Sup_Fig15.pdf [file NIHMS1541313-supplement-Sup_Fig15.pdf]

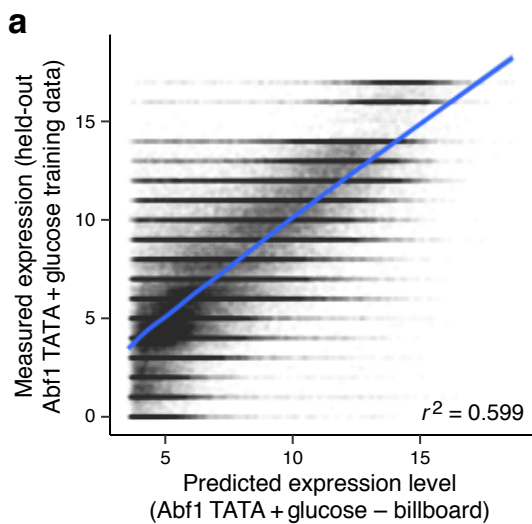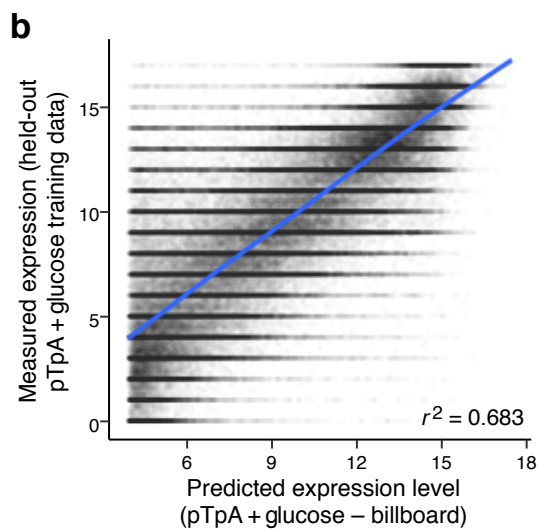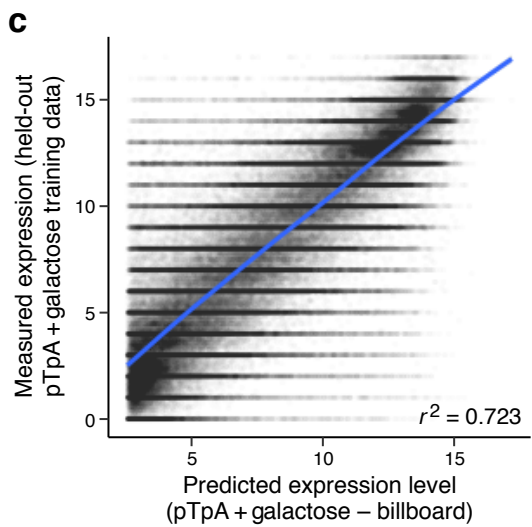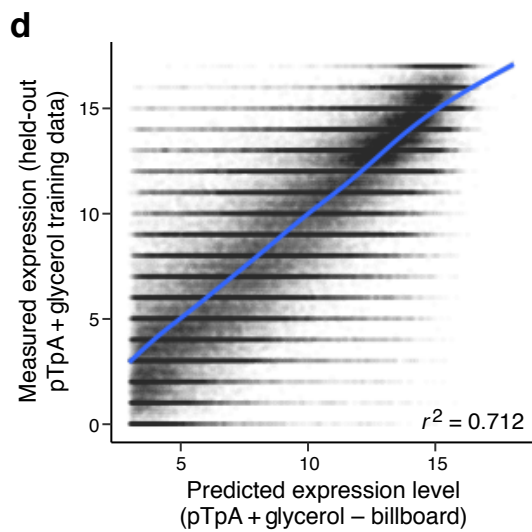

Supplement: NIHMS1541313-supplement-Sup_Fig2.pdf [file NIHMS1541313-supplement-Sup_Fig2.pdf]

Supp. Fig. 3

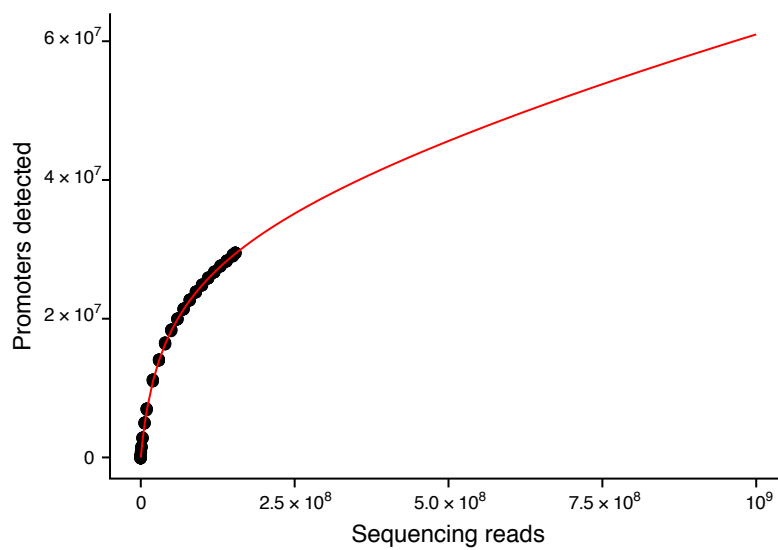

Supplement: NIHMS1541313-supplement-Sup_Fig3.pdf [file NIHMS1541313-supplement-Sup_Fig3.pdf]

# Supp. Fig. 4

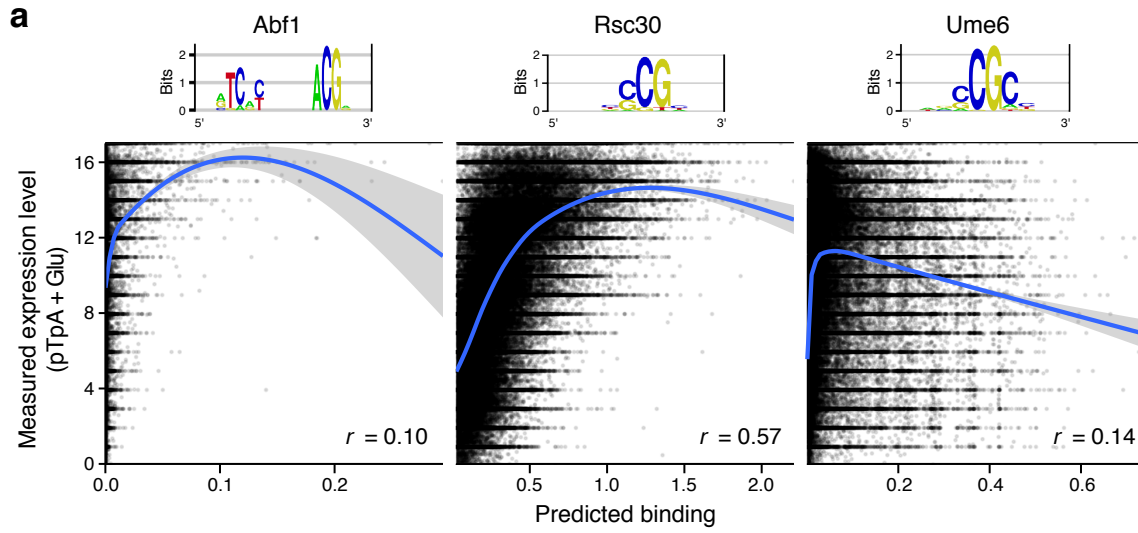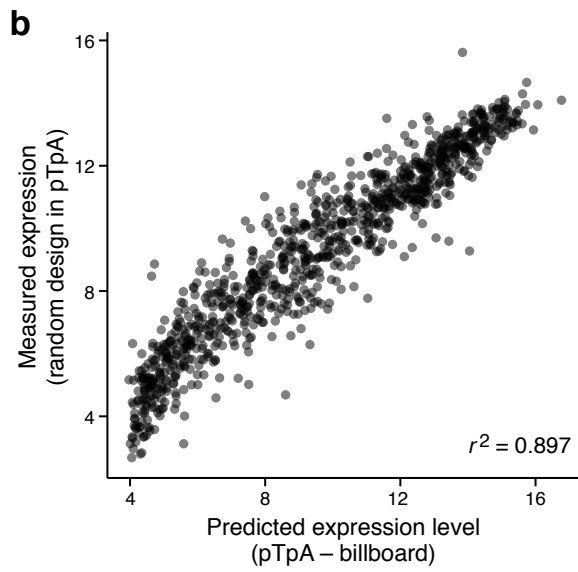

Supplement: NIHMS1541313-supplement-Sup_Fig4.pdf [file NIHMS1541313-supplement-Sup_Fig4.pdf]

# Supp. Fig. 5

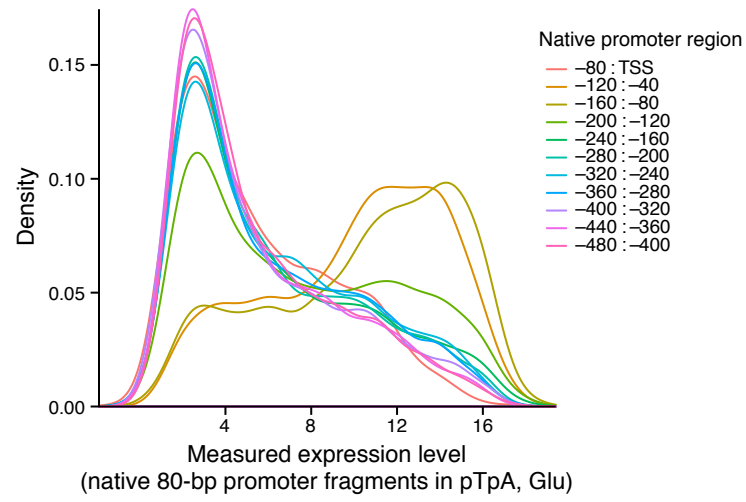

Supplement: NIHMS1541313-supplement-Sup_Fig5.pdf [file NIHMS1541313-supplement-Sup_Fig5.pdf]

# Supp. Fig. 6

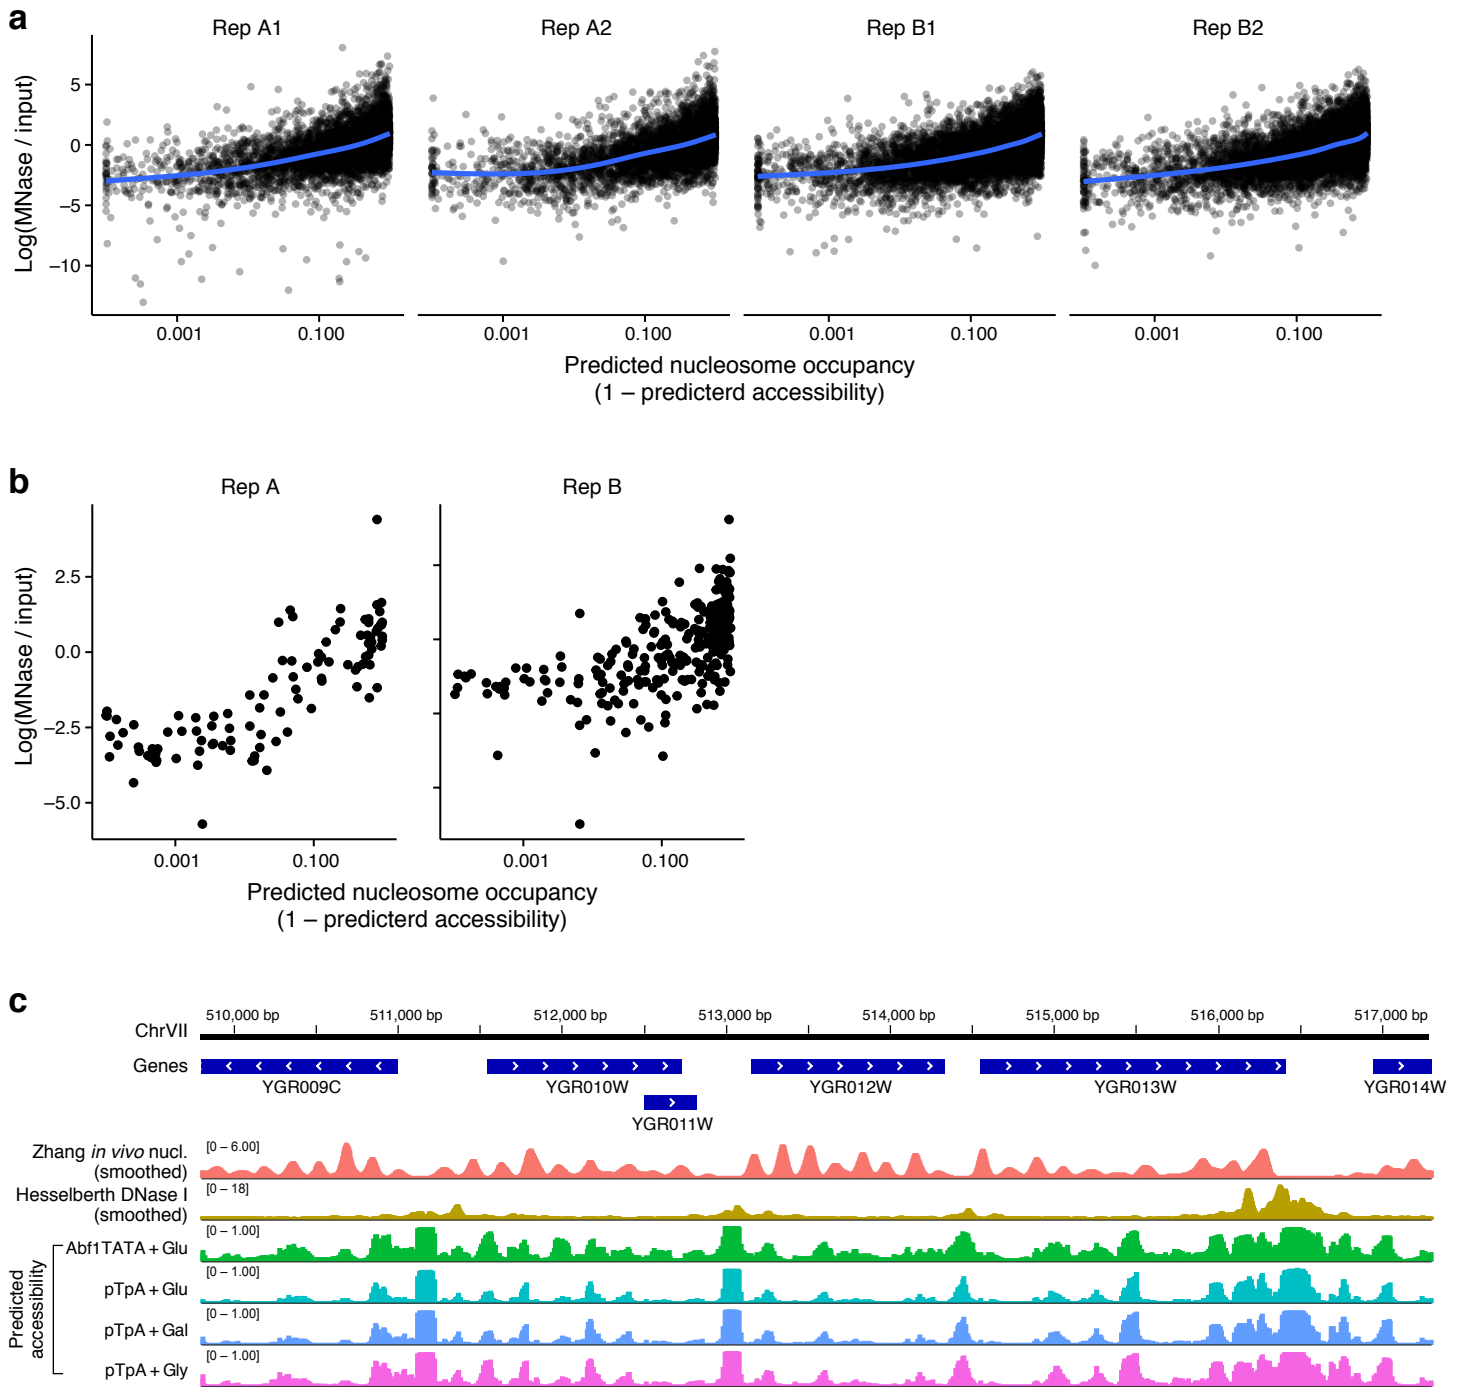

Supplement: NIHMS1541313-supplement-Sup_Fig6.pdf [file NIHMS1541313-supplement-Sup_Fig6.pdf]

# Supp. Fig. 7

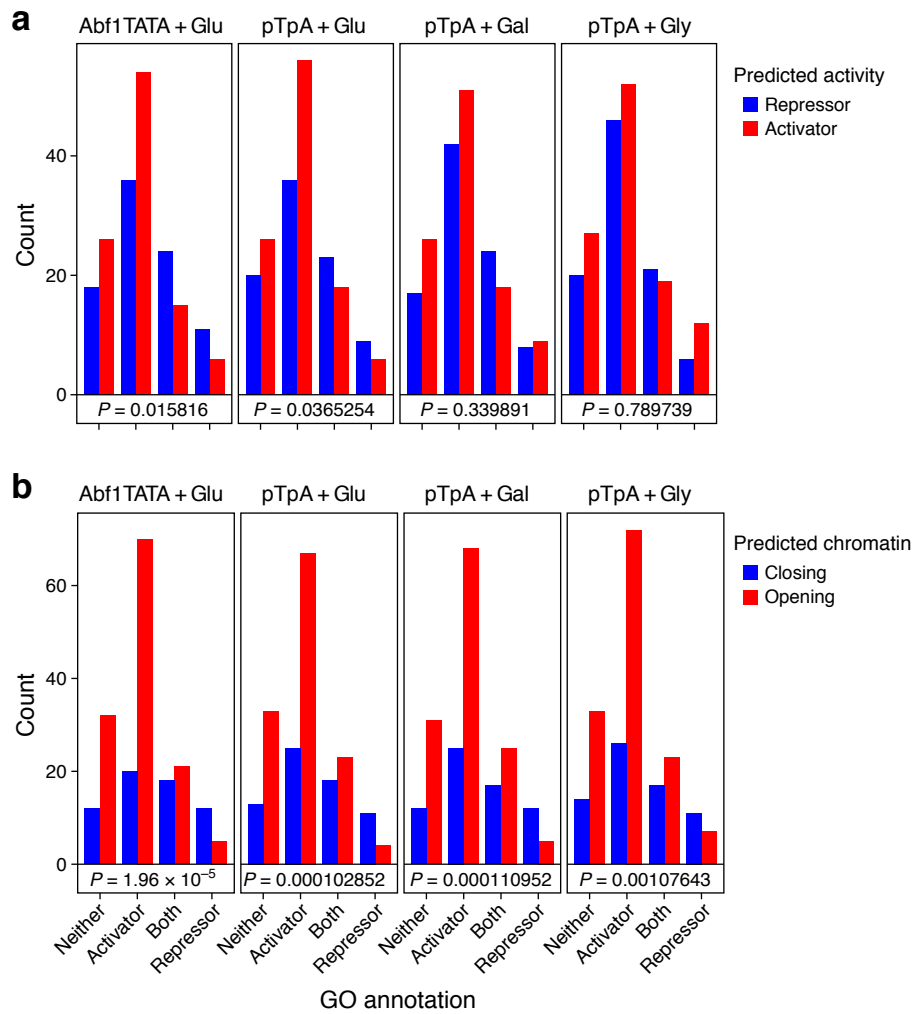

Supplement: NIHMS1541313-supplement-Sup_Fig7.pdf [file NIHMS1541313-supplement-Sup_Fig7.pdf]

# Supp. Fig. 8

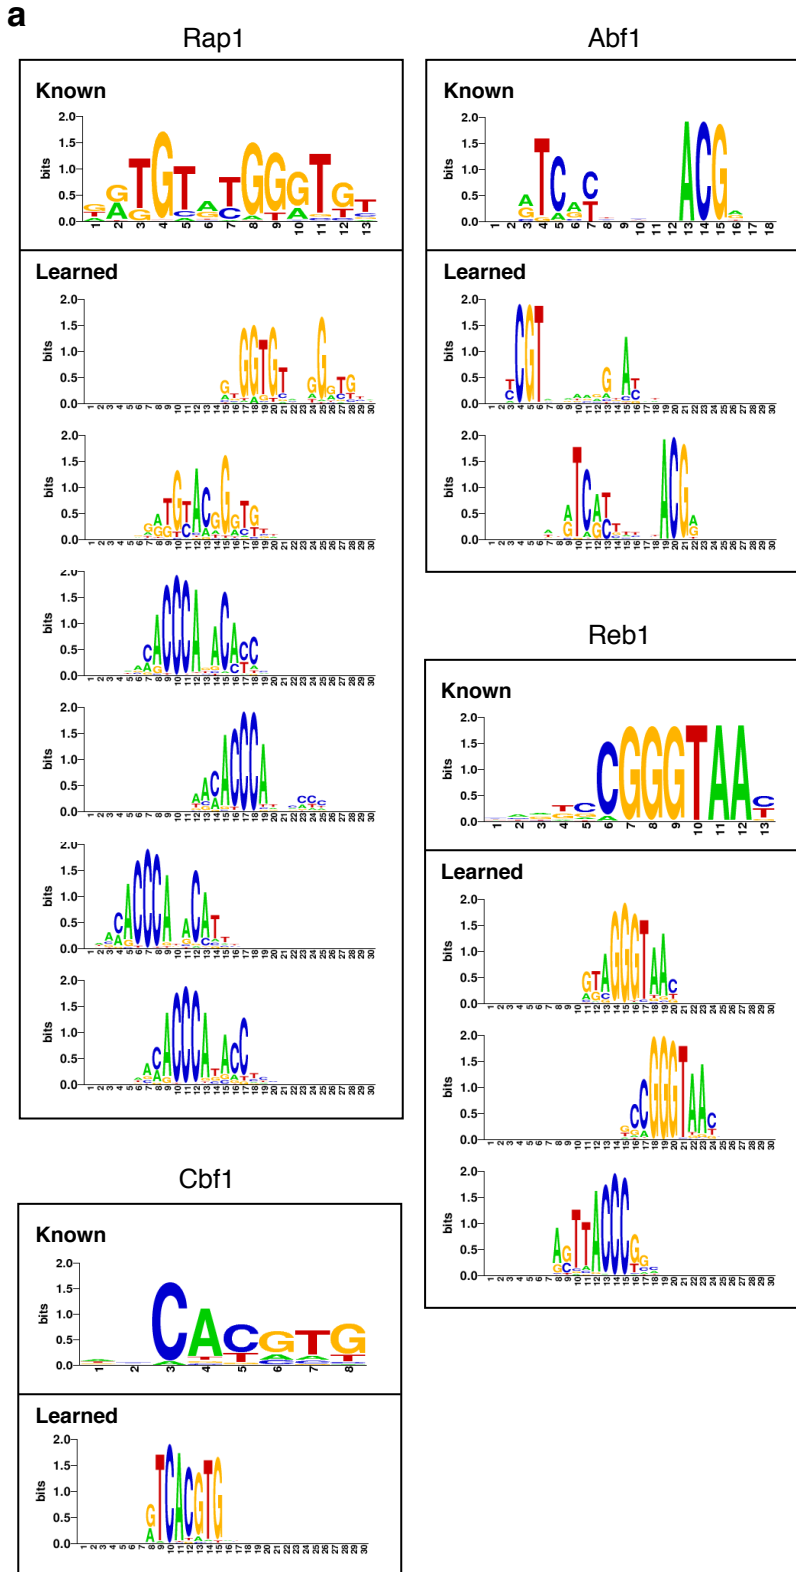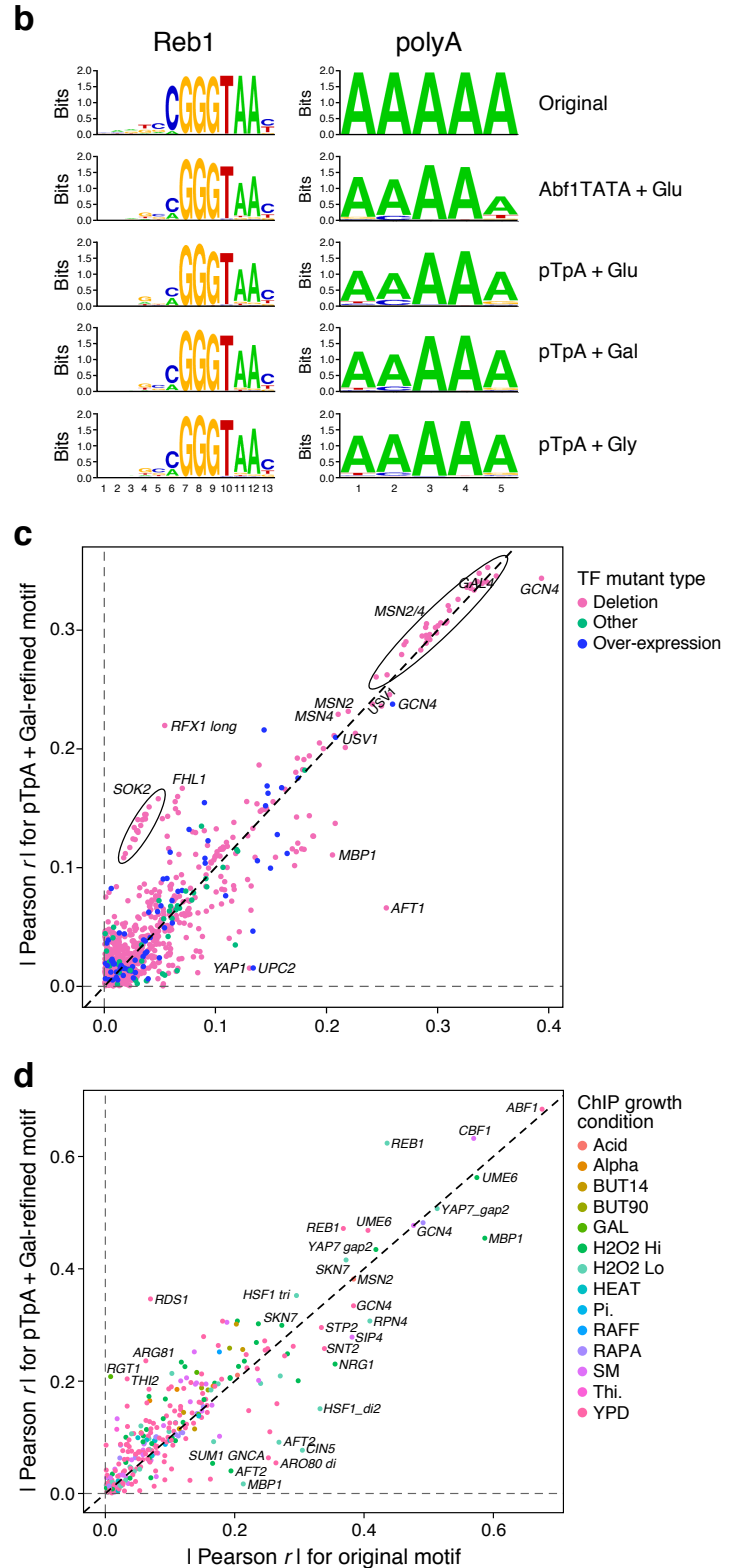

Supplement: NIHMS1541313-supplement-Sup_Fig8.pdf [file NIHMS1541313-supplement-Sup_Fig8.pdf]
